# Supplementary material for: Molecular-evaluated and explainable drug repurposing for COVID-19 using ensemble knowledge graph embedding
Source: PubMed Central journal article supplement (PMC9985643; doi:10.1038/s41598-023-30095-z), 2023-03-04
Supplement: 41598_2023_30095_MOESM1_ESM.pdf [file 41598_2023_30095_MOESM1_ESM.pdf]

## Supplementary Information-I

Table S1: Data source-wise entity-pair collection

| Entity-type pair        | Data Sources |         |          |           |         |        |              |
|-------------------------|--------------|---------|----------|-----------|---------|--------|--------------|
| ↓                       | Drugbank     | GNBR    | Hetionet | STRING    | IntAct  | DGIdb  | Bibliography |
| Gene:Gene               |              | 66,722  | 474,526  | 1,496,708 | 254,346 |        | 58,629       |
| Compound:Gene           | 24,801       | 80, 803 | 51, 429  |           | 1,805   | 26,290 | 25,666       |
| Disease:Gene            |              | 95,399  | 27,977   |           |         |        | 461          |
| Atc:Compound            | 15,750       |         |          |           |         |        |              |
| Compound:Compound       | 1,379,271    |         | 6,486    |           |         |        |              |
| Compound:Disease        | 4,968        | 77,782  | 1,145    |           |         |        |              |
| Gene:Tax                |              | 14,663  |          |           |         |        |              |
| Gene:Biological-process |              |         | 559,504  |           |         |        |              |
| Disease:Symptom         |              |         | 3,357    |           |         |        |              |
| Anatomy:Disease         |              |         | 3,602    |           |         |        |              |
| Disease:Disease         |              |         | 543      |           |         |        |              |
| Anatomy:Gene            |              |         | 726,495  |           |         |        |              |
| Gene:Molecular-function |              |         | 97,222   |           |         |        |              |
| Compound:Pharma.-class  |              |         | 1,029    |           |         |        |              |
| Gene:Cellular-component |              |         | 73,566   |           |         |        |              |
| Gene:Pathway            |              |         | 84,372   |           |         |        |              |
| Compound:Side-effect    |              |         | 138,944  |           |         |        |              |

Table S2: Scoring functions of KG embedding methods:  $h$ ,  $r$  and  $t$  are head, relation, tail of a triple, embeddings of  $h$ ,  $r$  and  $t$  are denoted in bold text,  $w_r$  is the normal vector of the hyperplane for  $r$ ,  $diag(r)$  is the diagonal matrix for  $r$ , and  $\|\cdot\|_2$  represents  $l_2$  norm.

| Method   | Embeddings                                        | Scoring function, $f(h, r, t)$                                                                    |
|----------|---------------------------------------------------|---------------------------------------------------------------------------------------------------|
| TransE   | $\mathbf{h}, \mathbf{t}, \mathbf{r} \in R^d$      | $-\ \mathbf{h} + \mathbf{r} - \mathbf{t}\ _2$                                                     |
| TransH   | $\mathbf{h}, \mathbf{t}, \mathbf{r}, w_r \in R^d$ | $-\ (\mathbf{h} - w_r^T \mathbf{h} w_r) + \mathbf{r} - (\mathbf{t} - w_r^T \mathbf{t} w_r)\ _2^2$ |
| DistMult | $\mathbf{h}, \mathbf{t}, \mathbf{r} \in R^d$      | $\mathbf{h}^T diag(r) \mathbf{t}$                                                                 |

Table S3: Link prediction results in raw and cleaned DRKG

| KGE method             | Original DRKG |       |       |        | Cleaned DRKG |       |       |        |
|------------------------|---------------|-------|-------|--------|--------------|-------|-------|--------|
|                        | MRR           | Hit@1 | Hit@3 | Hit@10 | MRR          | Hit@1 | Hit@3 | Hit@10 |
| TransE <sup>7</sup>    | 0.1670        | 7.93  | 20.61 | 31.66  | 0.1672       | 7.99  | 20.60 | 31.63  |
| TransH <sup>16</sup>   | 0.1602        | 7.22  | 20.09 | 30.50  | 0.1623       | 7.54  | 20.46 | 30.60  |
| DistMult <sup>17</sup> | 0.1392        | 4.37  | 18.63 | 29.98  | 0.1417       | 5.17  | 19.01 | 30.03  |

Table S4: 27 disease entities for the COVID-19 disease

|                  |                       |                  |
|------------------|-----------------------|------------------|
| SARS-CoV-2 E     | SARS-CoV-2 N          | SARS-CoV-2 nsp1  |
| SARS-CoV-2 nsp12 | SARS-CoV-2 nsp14      | SARS-CoV-2 nsp2  |
| SARS-CoV-2 nsp5  | SARS-CoV-2 nsp5 C145A | SARS-CoV-2 nsp7  |
| SARS-CoV-2 nsp9  | SARS-CoV-2 orf3a      | SARS-CoV-2 orf6  |
| SARS-CoV-2 orf8  | SARS-CoV-2 orf9c      | SARS-CoV-2 M     |
| SARS-CoV-2 Spike | SARS-CoV-2 nsp10      | SARS-CoV-2 nsp13 |
| SARS-CoV-2 nsp15 | SARS-CoV-2 nsp4       | SARS-CoV-2 nsp11 |
| SARS-CoV-2 nsp6  | SARS-CoV-2 nsp8       | SARS-CoV-2 orf10 |
| SARS-CoV-2 orf3b | SARS-CoV-2 orf7a      | SARS-CoV-2 orf9b |

Table S5: 31 clinical trial drugs for the COVID-19 disease

| Drug name          | Drug name    | Drug name          | Drug name    |
|--------------------|--------------|--------------------|--------------|
| Deferoxamine       | Piclidenoson | Losartan           | Ibuprofen    |
| Favipiravir        | Ruxolitinib  | Dexamethasone      | Thalidomide  |
| Tranexamic acid    | Tocilizumab  | Sarilumab          | Tradipitant  |
| Angiotensin 1-7    | Oseltamivir  | Baricitinib        | Sargramostim |
| Chloroquine        | Anakinra     | Mavrilimumab       | Azithromycin |
| Tetrandrine        | Bevacizumab  | Tofacitinib        | Siltuximab   |
| Nivolumab          | Nitric Oxide | Colchicine         | Remdesivir   |
| Hydroxychloroquine | Eculizumab   | Methylprednisolone |              |

Table S6: Details of PDBs for the SARS-CoV-2 nsp13 protein. PDB-IDs denote identifiers of PDB structures. The ligands from PDBs are given with their PubChem database identifiers (Pubchem-IDs), abbreviated (Abbr.) and IUPAC names. The last column gives Root-Mean-Square Deviation (RMSD) values of PDBs based on ATP binding site.

| PDB-ID              | Ligand     |       |                                                           | RMSD (Å)     |
|---------------------|------------|-------|-----------------------------------------------------------|--------------|
|                     | Pubchem-ID | Abbr. | IUPAC name                                                |              |
| 7nio                | -          | -     | -                                                         | 0,000        |
| 5rli                | 118569     | JFM   | N-(2-phenylethyl)methanesulfonamide                       | 0.496        |
| 5rlt                | 225773     | UVJ   | 3-(2-methyl-1H-benzimidazol-1-yl)propanamide              | 0.513        |
| 5rmk                | 19786643   | O2A   | N-methyl-1H-indole-7-carboxamide                          | 0.519        |
| 5rlj                | 94347260   | VW4   | (2S)-2-phenylpropane-1-sulfonamide                        | 0.520        |
| 5rmc                | 2806372    | 6SU   | methyl 3-(methylsulfonylamino)benzoate                    | 0.523        |
| 5rm7                | 836055     | N0E   | ~N-(4-hydroxyphenyl)-3-phenyl-propanamide                 | 0.533        |
| 5rmj                | 978238     | JOV   | 3-chloro-N-(1-hydroxy-2-methylpropan-2-yl)benzamide       | 0.534        |
| 5rl9                | 63648807   | UR7   | 1-(3-fluoro-4-methylphenyl)methanesulfonamide             | 0.537        |
| 5rl8                | 4693938    | VVG   | N-(2-fluorophenyl)ethanesulfonamide                       | 0.541        |
| 5rm0                | 22882465   | S7G   | ~N-[(3 R)-1,2,3,4-tetrahydroquinolin-3-yl]ethanamide      | 0.543        |
| 5rlh                | 2777223    | K2P   | 2-(trifluoromethoxy)benzoic acid                          | 0.544        |
| 5rma                | 694486     | JHJ   | N-(4-methoxyphenyl)-N'-pyridin-4-ylurea                   | 0.544        |
| 5rm5                | 51114235   | NUA   | N-(1-ethyl-1H-pyrazol-4-yl)cyclobutanecarboxamide         | 0.545        |
| 5rlp                | 8120202    | VWA   | (1S)-1-(4-fluorophenyl)-N-methylethan-1-amine             | 0.549        |
| 5rlk                | 71757215   | NYV   | 1-(propan-2-yl)-1H-imidazole-4-sulfonamide                | 0.550        |
| 5rlc                | 31390      | VVM   | 4-amino-N-phenylbenzene-1-sulfonamide                     | 0.558        |
| 5rme                | 863558     | RYM   | 4-(benzimidazol-1-ylmethyl)benzenecarbonitrile            | 0.561        |
| 5rlo                | 43539927   | UQS   | N-[(2-fluorophenyl)methyl]-1H-pyrazol-4-amine             | 0.563        |
| 5rm6                | 33381566   | HR5   | ~N-(cyclobutylmethyl)-1,5-dimethyl-pyrazole-4-carboxamide | 0.570        |
| 5rm2                | 330448     | UXG   | 1-(diphenylmethyl)azetididin-3-ol                         | 0.573        |
| 5rmg                | 91650      | MUK   | 4,6-dimethyl- N-phenyl-pyrimidin-2-amine                  | 0.574        |
| 5rmm                | 155387694  | VXG   | (3S,4R)-1-acetyl-4-phenylpyrrolidine-3-carboxylic acid    | 0.580        |
| 5rm3                | 68423044   | S7J   | 2-(trifluoromethyl)pyrimidine-5-carboxamide               | 0.582        |
| 5rlz                | 124505295  | VWM   | (3R)-1-acetyl-3-hydroxypiperidine-3-carboxylic acid       | 0.584        |
| 5rlm                | 71757930   | VW7   | N-(8-methyl-1,2,3,4-tetrahydroquinolin-5-yl)acetamide     | 0.588        |
| 5rm9                | 934518     | EJQ   | ~N-(4-fluorophenyl)-2-pyrrolidin-1-yl-ethanamide          | 0.591        |
| 5rld                | 910270     | VVY   | 2-phenoxy-1-(pyrrolidin-1-yl)ethan-1-one                  | 0.599        |
| 5rly                | 57116692   | K34   | 5-(1,3-thiazol-2-yl)-1H-1,2,4-triazole                    | 0.603        |
| 7nng                | 43363487   | UJK   | 1-(2-methylphenyl)-1,2,3-triazole-4-carboxylic acid       | 0.616        |
| 5rlr                | 12684717   | VWD   | (1R)-2-(methylsulfonyl)-1-phenylethan-1-ol                | 0.623        |
| 5rl6                | 828139     | LJA   | N-[3-(carbamoylamino)phenyl]acetamide                     | 0.632        |
| 5rlg                | 43082989   | VW1   | (2S)-2-(4-cyanophenoxy)propanamide                        | 0.642        |
| 5rmd                | 961974     | VWY   | N-ethyl-4-[(methylsulfonyl)amino]benzamide                | 0.656        |
| 5rm1                | 2760997    | RY4   | N-[4-(aminomethyl)phenyl]methanesulfonamide               | 0.699        |
| 5rlu                | 4291023    | JG4   | 2-(thiophen-2-yl)-1H-imidazole                            | 1.184        |
| 5rlf                | 16226828   | NY7   | N-(2-methoxy-5-methylphenyl)glycinamide                   | 1.205        |
| 5rlh                | 45792228   | NZG   | 3-(acetylamino)-4-fluorobenzoic acid                      | 1.230        |
| 5rmh                | 96462663   | VX4   | [(4S)-4-methylazepan-1-yl](1,3-thiazol-4-yl)methanone     | 1.256        |
| 5rmf                | 588246     | NX7   | (2,6-difluorophenyl)(pyrrolidin-1-yl)methanone            | 1.273        |
| 5rlv                | 16653131   | VWJ   | N-(propan-2-yl)-1H-benzimidazol-2-amine                   | 1.273        |
| 5rlb                | 53516552   | VVJ   | N-cycloheptyl-N-methylmethanesulfonamide                  | 1.283        |
| 5rl7                | 19261749   | VVD   | 5-(acetylamino)-2-fluorobenzoic acid                      | 1.288        |
| 5rmb                | 2763377    | VWV   | ethyl (1,1-dioxo-1lambda 6 ,4-thiazinan-4-yl)acetate      | 1.289        |
| 5rls                | 148031     | VWG   | N-hydroxyquinoline-2-carboxamide                          | 1.304        |
| 5rlq                | 14196351   | UVA   | N-methyl-2-(methylsulfonyl)aniline                        | 1.313        |
| 5rml                | 2517697    | VXD   | N-(3-chloro-2-methylphenyl)glycinamide                    | 1.316        |
| 5rlw                | 1530178    | S9S   | ~N-[2-(4-fluorophenyl)ethyl]methanesulfonamide            | 1.341        |
| 5rmi                | 686921     | STV   | ~N-(1,3-benzodioxol-5-ylmethyl)ethanesulfonamide          | 1.349        |
| <b>Average RMSD</b> |            |       |                                                           | <b>0.777</b> |

Table S7: List of residues in nsp13 structure interacting with the listed ligands (predicted ligands are highlighted in light cyan, the others correspond to known ligands). Ligands are ranked as in Table 3. Residue label and position are in bold when they correspond to residues delineating the ATP binding site. One-letter residue names are used.

| Ligands      | <b>E261</b> | <b>N265</b> | P283 | G285 | <b>G287</b> | <b>K288</b> | <b>S289</b> | <b>H290</b> | A313 | A316 | <b>K320</b> | <b>K323</b> | <b>E375</b> | D401 | <b>Q404</b> | L438 | G439 | T440 | <b>R442</b> | R443 | Q537 | G538 | E540 | K569 |
|--------------|-------------|-------------|------|------|-------------|-------------|-------------|-------------|------|------|-------------|-------------|-------------|------|-------------|------|------|------|-------------|------|------|------|------|------|
| Diosmin      | X           |             | X    | X    | X           | X           | X           | X           |      |      | X           |             |             |      |             | X    | X    | X    | X           |      |      | X    | X    |      |
| Fosinopril   |             |             |      | X    | X           | X           | X           |             | X    | X    | X           |             | X           |      |             |      |      |      | X           |      |      |      | X    |      |
| Ergotamine   |             |             |      | X    |             | X           | X           | X           |      |      | X           |             | X           |      |             |      |      |      | X           | X    |      |      | X    | X    |
| Eprosartan   |             |             |      |      |             | X           | X           |             | X    |      | X           |             |             | X    | X           |      |      |      |             |      |      |      |      |      |
| Macitentan   |             |             |      |      |             |             |             | X           |      |      | X           | X           |             |      |             |      |      |      | X           |      |      |      |      |      |
| Dinoprostone |             | X           |      | X    | X           | X           | X           | X           |      |      | X           |             |             |      |             | X    |      |      | X           |      |      |      |      |      |
| Risperdal    |             |             |      |      |             | X           | X           | X           |      |      | X           |             | X           |      |             |      |      |      |             |      | X    | X    | X    |      |

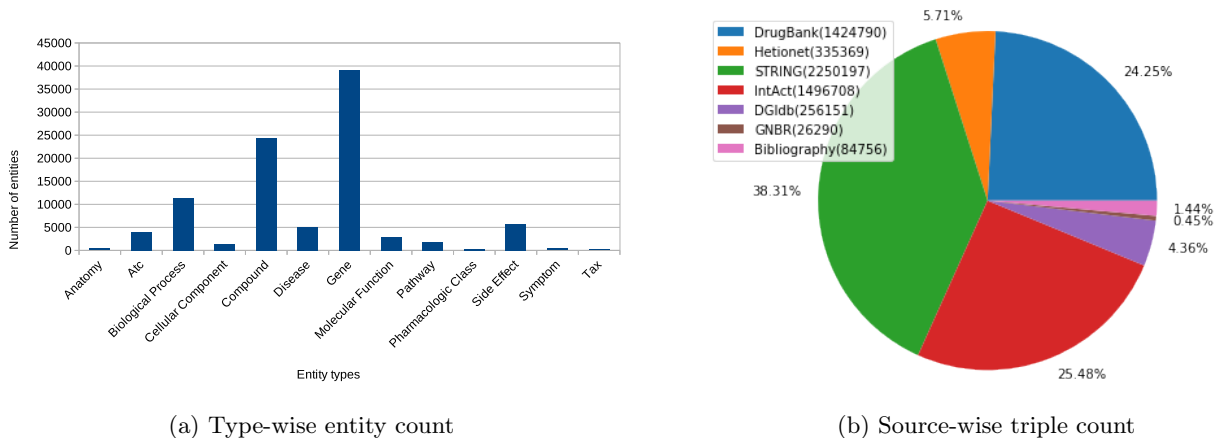

Figure S1: DRKG statistics: (a) Approximately 75% entities are either genes or compounds, (b) Approximately 65% of triples come from two data-source STRING and IntAct. The rest triples come from other remaining five data-sources.

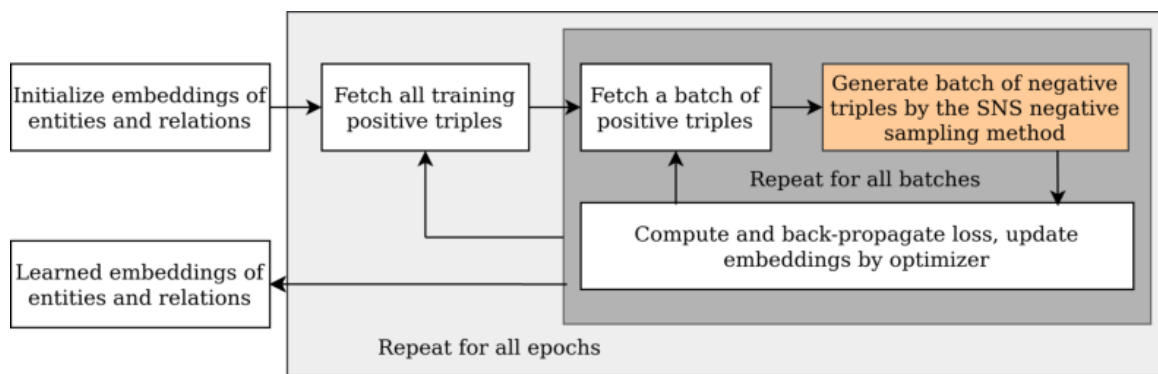

Figure S2: Architecture of a classical KG embedding model with SNS sampling<sup>8</sup>.

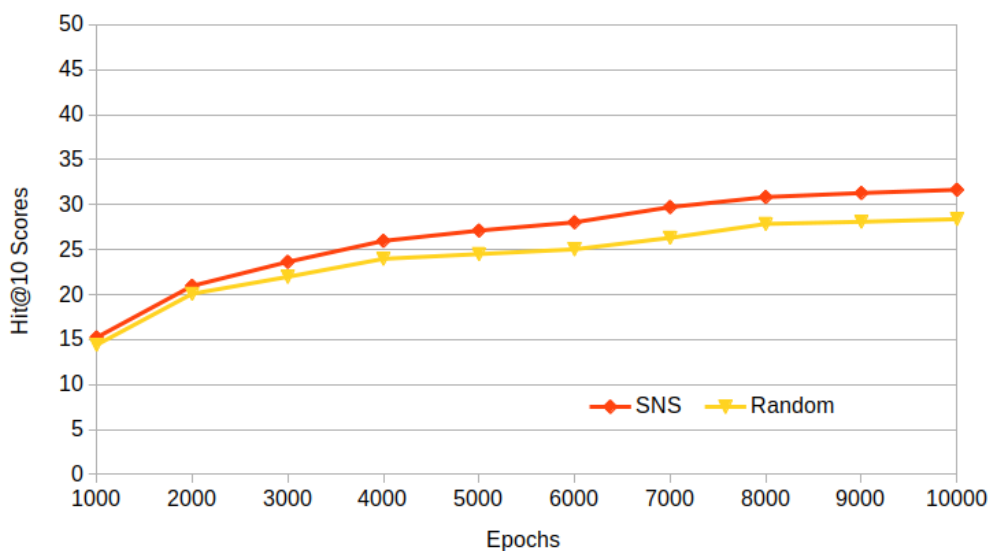

Figure S3: Hit@10 scores for SNS and Random sampling with TransE method for different epochs.
