# Supplementary material for: Molecular-evaluated and explainable drug repurposing for COVID-19 using ensemble knowledge graph embedding
Source: PubMed Central journal article supplement (PMC9985643; doi:10.1038/s41598-023-30095-z), 2023-03-04
Supplement: 41598_2023_30095_MOESM6_ESM.pdf [file 41598_2023_30095_MOESM6_ESM.pdf]

# Supplementary-VI

## 1 Assessing the significance of the cross-matching of the prediction results with in-trial drugs

Our study matched the Top-100 (not only the Top-20) drugs ranked by our model with in-trial drugs and we found only 10 in-trial drugs which are displayed in the Top-20 drugs listed in Table 1. The complete Top-100 is displayed in Supplementary II as indicated in the paper.

The probability to obtain at random X in-trial drugs in the Top-K drugs ranked by our model, from a set of N=8103 drugs in total, including Y=31 in-trial drugs is given by the following hypergeometric law.

$$p(X) = \frac{\binom{Y}{X} \times \binom{N-K}{K-X}}{\binom{N}{K}}$$

Here,  $\binom{Y}{X}$  is the binomial coefficient of Y and X. For K= 100 and X=10 we obtain a p-value of  $1.81 \times 10^{-12}$ , that must be corrected for multiple testing. Indeed each score is predicted 27 times (one for each COVID-19 target) for the 8103 drugs, leading to a total number of tests of 218,781, rounded as  $2.2 \times 10^5$ . Multiplying the p-value by this number yields  $3.98 \times 10^{-7}$ .

## 2 Permutation test for assessing the significance of our drug prediction model

For permutation test we follow the article:

*Ojala & Garriga (2010). Permutation Tests for Studying Classifier Performance. Journal of Machine Learning Research, vol 11, pp. 1833-1863.*

At first, we prepare 10 training/test sets from the original dataset. Then, for each split (D):

1. compute the AUC on the test set of the prediction model trained on the training set
2. randomly shuffle labels of training and test independently for 100 times to get 100 permuted sets  $\hat{D}$  of D
3. For each  $D' \in \hat{D}$ , train the prediction model using permuted training set and compute AUC on the permuted test set
4. Compute the p-value on AUC values computed on  $\hat{D}$  using the formula:

$$p - value = \frac{|\{D' \in \hat{D} : AUC(f(D')) > AUC(f(D))\}| + 1}{|\hat{D}| + 1}$$

Here,  $f$  is the prediction model. And we see from this formula that for  $|\hat{D}| = 100$ , the best and worst possible p-values are 0.01 and 1.00 respectively.

In the following figure, we visualize the distribution of AUC values for one split (representative of the distributions for other splits). Finally, the average p-value is computed over the 10 splits yielding p=0.01 (Std = 0).

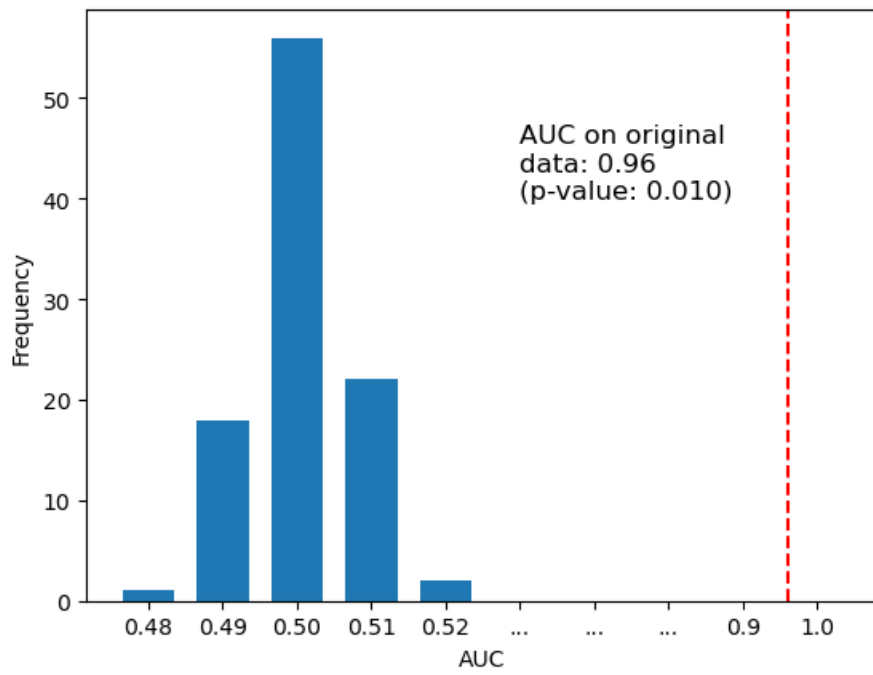

Figure S1: Distribution of AUC values for 100 permutations in a single split: The red line represents the AUC computed on the original dataset

### 3 Details of relations in the cleaned DRKG

In the original DRKG knowledge graph, relation names are written in the form 'Data-source::Relation-name::Head type:Tail type'. In this table, we simplify all relations by only keeping 'Relation-name'. In case of a relation occurring multiple times (such as 'Other' or 'Association'), we append a number to such relations to differentiate them. Table S1 gives the list of simplified relations with a short description.

Table S1: Relations in the cleaned DRKG graph. The first column denotes the relation name as provided in the data source (last column). The second column gives a short description, the third and fourth columns denote the head and tail entity types respectively. Relations are sorted according to their data source.

| Relation                  | Short description                                                                                                              | Head entity type | Tail entity type | Source   |
|---------------------------|--------------------------------------------------------------------------------------------------------------------------------|------------------|------------------|----------|
| HumGen-HumGen             | Physical interaction among host proteins                                                                                       | Gene             | Gene             | Biorxiv  |
| VirGen-HumGen             | Physical interaction between virus and host proteins                                                                           | Gene             | Gene             | Biorxiv  |
| Drug-VirGen               | Interaction between drug and virus proteins                                                                                    | Compound         | Gene             | Biorxiv  |
| Drug-HumGen               | Interaction between drug and host proteins                                                                                     | Compound         | Gene             | Biorxiv  |
| Covid2_acc_host_gene      | High-confidence SARS-CoV-2 and host protein interaction                                                                        | Disease          | Gene             | Biorxiv  |
| Coronavirus_ass_host_gene | Coronavirus-host association (experimental evidence)                                                                           | Disease          | Gene             | Biorxiv  |
| Inhibitor                 | Binding, decrease expression                                                                                                   | Gene             | Compound         | DGIDB    |
| Antagonist                | Blocking or dampening agonist-mediated responses                                                                               | Gene             | Compound         | DGIDB    |
| Other-1                   | Interaction that doesn't belong to other interactions in DGIDB                                                                 | Gene             | Compound         | DGIDB    |
| Agonist                   | Binding, activating the receptor                                                                                               | Gene             | Compound         | DGIDB    |
| Binder                    | Physical binding                                                                                                               | Gene             | Compound         | DGIDB    |
| Modulator                 | Regulating target without involving in any direct binding to the target.                                                       | Gene             | Compound         | DGIDB    |
| Blocker                   | Blocking interaction                                                                                                           | Gene             | Compound         | DGIDB    |
| Channel-Blocker           | Channel blocking interaction                                                                                                   | Gene             | Compound         | DGIDB    |
| Antibody                  | Antibody-target binding interaction                                                                                            | Gene             | Compound         | DGIDB    |
| Positive-Modulator        | Increasing activity of the target enzyme                                                                                       | Gene             | Compound         | DGIDB    |
| Allosteric-Modulator      | Modulator interaction where drugs exert their effects on targets via a different binding site than the orthosteric ligand site | Gene             | Compound         | DGIDB    |
| Activator                 | Activating biological responses from targets                                                                                   | Gene             | Compound         | DGIDB    |
| Partial-Agonist           | Eliciting reduced amplitude functional responses at target receptors                                                           | Gene             | Compound         | DGIDB    |
| x-atc                     | Anatomical Therapeutic Chemical (ATC) code                                                                                     | Compound         | Atc              | DrugBank |
| ddi-interactor-in         | Interaction among drugs                                                                                                        | Compound         | Compound         | DrugBank |
| Target                    | Drug-disease target interaction                                                                                                | Compound         | Gene             | DrugBank |
| Enzyme                    | Drug-enzyme interaction                                                                                                        | Compound         | Gene             | DrugBank |
| Carrier                   |                                                                                                                                | Compound         | Gene             | DrugBank |
| Treat                     | Treatment interaction                                                                                                          | Compound         | Disease          | Merged   |
| E                         | Affects expression (neutral)                                                                                                   | Compound         | Gene             | GNBR     |
| A+                        | Agonism, activation                                                                                                            | Compound         | Gene             | GNBR     |
| N                         | Inhibits                                                                                                                       | Compound         | Gene             | GNBR     |
| K                         | Metabolism, pharmacokinetics                                                                                                   | Compound         | Gene             | GNBR     |
| A-                        | Antagonism, blocking                                                                                                           | Compound         | Gene             | GNBR     |
| E+                        | Increasing expression                                                                                                          | Compound         | Gene             | GNBR     |
| B                         | Binding, ligand (esp. receptors)                                                                                               | Compound         | Gene             | GNBR     |
| E-                        | Decrease expression                                                                                                            | Compound         | Gene             | GNBR     |
| O                         | Transport, channels                                                                                                            | Compound         | Gene             | GNBR     |
| Z                         | Enzyme activity                                                                                                                | Compound         | Gene             | GNBR     |
| C                         | Inhibiting cell growth                                                                                                         | Compound         | Disease          | GNBR     |
| Sa                        | Side effect/adverse event                                                                                                      | Compound         | Disease          | GNBR     |
| Pa                        | Alleviating, reducing                                                                                                          | Compound         | Disease          | GNBR     |
| Mp                        | Biomarkers (of disease progression)                                                                                            | Compound         | Disease          | GNBR     |
| Pr                        | Prevents, suppresses                                                                                                           | Compound         | Disease          | GNBR     |
| J                         | Role in disease pathogenesis                                                                                                   | Compound         | Disease          | GNBR     |
| L                         | Improper regulation linked to disease                                                                                          | Gene             | Disease          | GNBR     |
| U                         | Causal mutations                                                                                                               | Gene             | Disease          | GNBR     |
| Y                         | Polymorphisms alter risk                                                                                                       | Gene             | Disease          | GNBR     |
| J                         | Role in pathogenesis                                                                                                           | Gene             | Disease          | GNBR     |
| Te                        | Possible therapeutic effect                                                                                                    | Gene             | Disease          | GNBR     |
| Md                        | Biomarkers (diagnostic)                                                                                                        | Gene             | Disease          | GNBR     |
| G                         | Promotes progression                                                                                                           | Gene             | Disease          | GNBR     |
| D                         | Drug targets                                                                                                                   | Gene             | Disease          | GNBR     |
| X                         | Overexpression in disease                                                                                                      | Gene             | Disease          | GNBR     |
| Ud                        | Mutations affecting disease course                                                                                             | Gene             | Disease          | GNBR     |
| V+                        | Activates, stimulates                                                                                                          | Gene             | Gene             | GNBR     |
| Q                         | Production by cell population                                                                                                  | Gene             | Gene             | GNBR     |
| Rg                        | Regulation                                                                                                                     | Gene             | Gene             | GNBR     |

|                       |                                                                                            |                     |                    |          |
|-----------------------|--------------------------------------------------------------------------------------------|---------------------|--------------------|----------|
| B                     | Binding, ligand (esp. receptors)                                                           | Gene                | Gene               | GNBR     |
| I                     | Signaling pathway                                                                          | Gene                | Gene               | GNBR     |
| E+                    | Increasing expression                                                                      | Gene                | Gene               | GNBR     |
| H                     | Same protein or complex                                                                    | Gene                | Gene               | GNBR     |
| W                     | Enhancing response                                                                         | Gene                | Gene               | GNBR     |
| E                     | Affecting expression (neutral)                                                             | Gene                | Gene               | GNBR     |
| In_tax                | Gene taxonomy                                                                              | Gene                | Tax                | GNBR     |
| GpBP                  | Participation                                                                              | Gene                | Biological-Process | Hetionet |
| GiG                   | Interaction                                                                                | Gene                | Gene               | Merged   |
| CrC                   | Resembling                                                                                 | Compound            | Compound           | Hetionet |
| DdG                   | Down-regulation                                                                            | Disease             | Gene               | Hetionet |
| DpS                   | Presence                                                                                   | Disease             | Symptom            | Hetionet |
| DlA                   | Localization                                                                               | Disease             | Anatomy            | Hetionet |
| CbG                   | Binding                                                                                    | Compound            | Gene               | Hetionet |
| Up-regulation (CuG)   | Up-regulation                                                                              | Compound            | Gene               | Hetionet |
| DrD                   | Resembling                                                                                 | Disease             | Disease            | Hetionet |
| Association (DaG)     | Association                                                                                | Disease             | Gene               | Hetionet |
| CpD                   | Palliation                                                                                 | Compound            | Disease            | Hetionet |
| AdG                   | Down-regulation                                                                            | Anatomy             | Gene               | Hetionet |
| AuG                   | Up-regulation                                                                              | Anatomy             | Gene               | Hetionet |
| GcG                   | Covariation                                                                                | Gene                | Gene               | Hetionet |
| GpMF                  | Participation                                                                              | Gene                | Molecular-Function | Hetionet |
| PCiC                  | Inclusion                                                                                  | Pharmacologic-Class | Compound           | Hetionet |
| GpCC                  | Participation                                                                              | Gene                | Cellular-Component | Hetionet |
| Regulation (Gr>G)     | Regulation                                                                                 | Gene                | Gene               | Hetionet |
| Down-regulation (CdG) | Down-regulation                                                                            | Compound            | Gene               | Hetionet |
| DuG                   | Up-regulation                                                                              | Disease             | Gene               | Hetionet |
| GpPW                  | Participation                                                                              | Gene                | Pathway            | Hetionet |
| CcSE                  | Cause                                                                                      | Compound            | Side-Effect        | Hetionet |
| AeG                   | Expression                                                                                 | Anatomy             | Gene               | Hetionet |
| Physical-Association  | Interaction between molecules within the same physical complex                             | Compound            | Gene               | INTACT   |
| Direct-Interaction    | Interaction between direct in-contact molecules                                            | Compound            | Gene               | INTACT   |
| Association-1         | Interaction between participating molecules that form one                                  | Compound            | Gene               | INTACT   |
| Association-2         | Interaction between participating molecules that form one                                  | Gene                | Gene               | INTACT   |
| Colocalization        | Interaction between molecules that are affiliated with the same cellular structure         | Gene                | Gene               | INTACT   |
| Dephosphorylation     | Relation among genes participating in dephosphorylation reaction                           | Gene                | Gene               | INTACT   |
| Cleavage              | Gene-gene relation as cleavage reaction occurs                                             | Gene                | Gene               | INTACT   |
| Phosphorylation       | Gene-gene relation as phosphorylation reaction occurs in signal transduction               | Gene                | Gene               | INTACT   |
| ADP-Ribosylation      | Relation among genes participating in ADP-Ribosylation reaction                            | Gene                | Gene               | INTACT   |
| Ubiquitination        | Relation between Ubiquitin-protein and substrate protein as ubiquitination reaction occurs | Gene                | Gene               | INTACT   |
| Protein-Cleavage      | Gene-gene relation as protein cleavage reaction occurs                                     | Gene                | Gene               | INTACT   |
| Reaction              | Gene-gene relation as other types of reaction occur                                        | Gene                | Gene               | STRING   |
| PTMOD                 | Gene-gene relation because of post-translational modification                              | Gene                | Gene               | STRING   |
| Catalysis             | Gene-gene relation as catalysis occurs                                                     | Gene                | Gene               | STRING   |
| Activation            | A gene activates another gene                                                              | Gene                | Gene               | STRING   |
| Inhibition            | A gene prevents another gene expression at the post-transcriptional level                  | Gene                | Gene               | STRING   |
| Other-2               | Other type of gene-gene relation                                                           | Gene                | Gene               | STRING   |
| Expression            | Expression among genes                                                                     | Gene                | Gene               | STRING   |
